# Supplementary material for: Protective CD8+ T Cell Response Induced by Modified Vaccinia Virus Ankara Delivering Ebola Virus Nucleoprotein
Source: Vaccines (Basel). 2022 Mar 29;10(4):533. doi: 10.3390/vaccines10040533 (PMC9027530; doi:10.3390/vaccines10040533)
Supplement: Supplementary file 1 [file vaccines-10-00533-s001.zip › vaccines-1632622-supplementary.pdf]

**Supplement Table S1:** Clinical scoring of EBOV-infected mice.

| <b>Score</b>                | <b>0</b>                                                                  | <b>1</b>                                               | <b>5</b>                                           | <b>10</b>                                                                                                                         |
|-----------------------------|---------------------------------------------------------------------------|--------------------------------------------------------|----------------------------------------------------|-----------------------------------------------------------------------------------------------------------------------------------|
| <b>Body weight</b>          | 0-5 % difference to mean individual body weight*                          | 6-10 % difference to mean individual body weight*      | 11-15 % difference to mean individual body weight* | >15 % difference to mean individual body weight*                                                                                  |
| <b>General condition</b>    | Fur smooth, shiny; body orifices clean, eyes clean and shiny              | Fur slightly ruffled, limited or exaggerated coat care | Dull fur; limited care of body orifices; eyes dull | Fur sticky or shaggy and ruffled; diarrhea; icterus or signs of coagulopathy                                                      |
| <b>Spontaneous behavior</b> | Normal behavior (sleeping, reaction to touch, curiosity, social contacts) | Slight change of normal behavior                       | Moderate changes of activity (hyper-/hypoactivity) | Massive changes of activity (hyper-/hypoactivity); lethargy, isolation, self-aggression or aggressive behavior against cage mates |

\* Measured on 3-5 days prior to infection.

| <b>Total score</b> | <b>Degree of severity</b> | <b>Explanation</b>                                                                             |
|--------------------|---------------------------|------------------------------------------------------------------------------------------------|
| 0                  | None                      | No physical burden, daily control (incl. weight)                                               |
| 1-3                | Low                       | Low burden, daily control (incl. weight) and additional daily adsectorial control              |
| 5-7                | Moderate                  | Moderate burden; clinical end point is reached if score is 6 or higher on two consecutive days |
| 10 or higher       | High                      | Heavy burden; clinical end point is reached if score is 10 or higher                           |

**Supplement Figure S1:** Plasmid maps of pIIH5red-EBOV-GP and pLW-73-EBOV-NP.

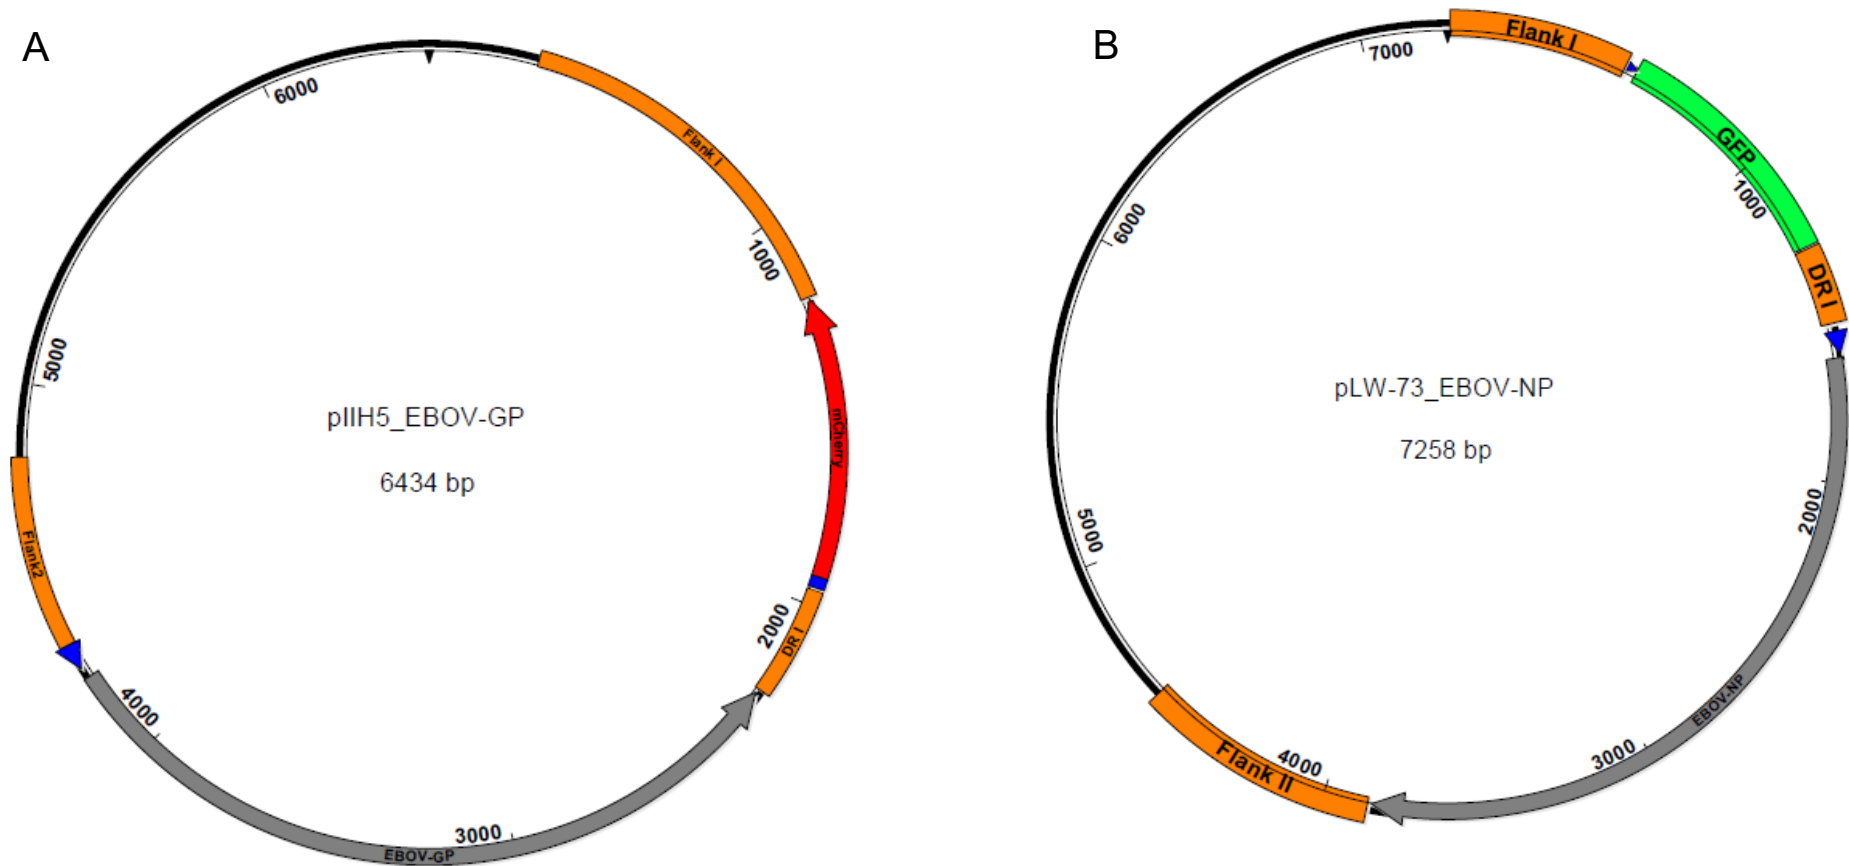

*Figure S1:* Plasmid maps of pIIH5red-EBOV-GP (A) and pLW-73-EBOV-NP (B). Flank-1 and flank-2 refer to MVA DNA sequences targeting the deletion site III (A) or the intergenic site 069R-070L (B) in the MVA genome for insertion of recombinant genes encoding for EBOV glycoprotein (EBOV-GP) or for EBOV nucleoprotein (EBOV-NP). Short repetitive sequences of MVA DNA (DR I) served to remove the marker genes (mCherry, GFP) by intragenomic homologous recombination (marker gene deletion).

**Supplement Figure S2:** Tissue of non-infected control mice.

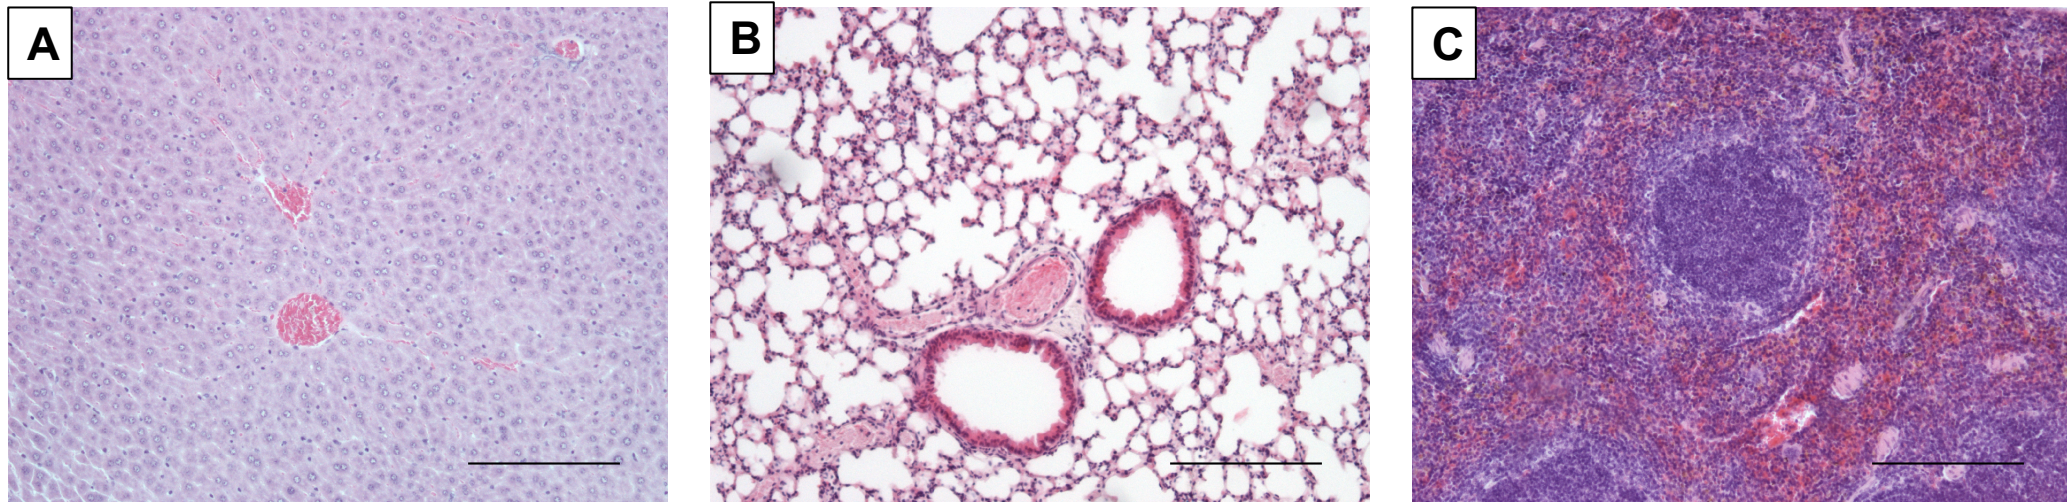

*Figure S2:* Tissue of non-infected control mice. (A) liver, (B) lung, (C) spleen of untreated IFNAR<sup>-/-</sup> mice; H&E staining. Scale bar: 200 μm.
